# Supplementary material
Source: PubMed Central journal article supplement (PMC8414377)
Supplement: ajcr0011-3857-f8.pdf [file ajcr0011-3857-f8.pdf]

# The anti-tumor functions of GSN 3'UTR in NSCLC cells

A

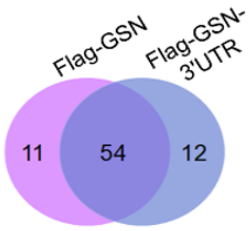

B

| Number | Gene Name                     | Protein IDs | Protein Name                                  |
|--------|-------------------------------|-------------|-----------------------------------------------|
| 1      | RSL1D1                        | O76021      | Ribosomal L1 domain-containing protein 1      |
| 2      | <b>TRA2<math>\beta</math></b> | P62995      | Transformer-2 protein homolog beta            |
| 3      | H1FO                          | P07305      | Histone H1.0                                  |
| 4      | THRAP3                        | Q9Y2W1      | Thyroid hormone receptor-associated protein 3 |
| 5      | KRT8                          | P05787      | Keratin, type II cytoskeletal 8               |
| 6      | RRBP1                         | Q9P2E9      | Ribosome-binding protein 1                    |
| 7      | RPS3                          | P23396      | 40S ribosomal protein 3                       |
| 8      | KRT18                         | P05783      | Keratin, type I cytoskeletal 18               |
| 9      | SSR3                          | Q9UNL2      | Translocon-associated protein subunit gamma   |
| 10     | RPS14                         | P62263      | 40S ribosomal protein 14                      |
| 11     | H2AFJ                         | Q9BTM1      | Histone H2A.J                                 |
| 12     | HIST1H2BM                     | Q99879      | Histone H2B type 1-M                          |

C

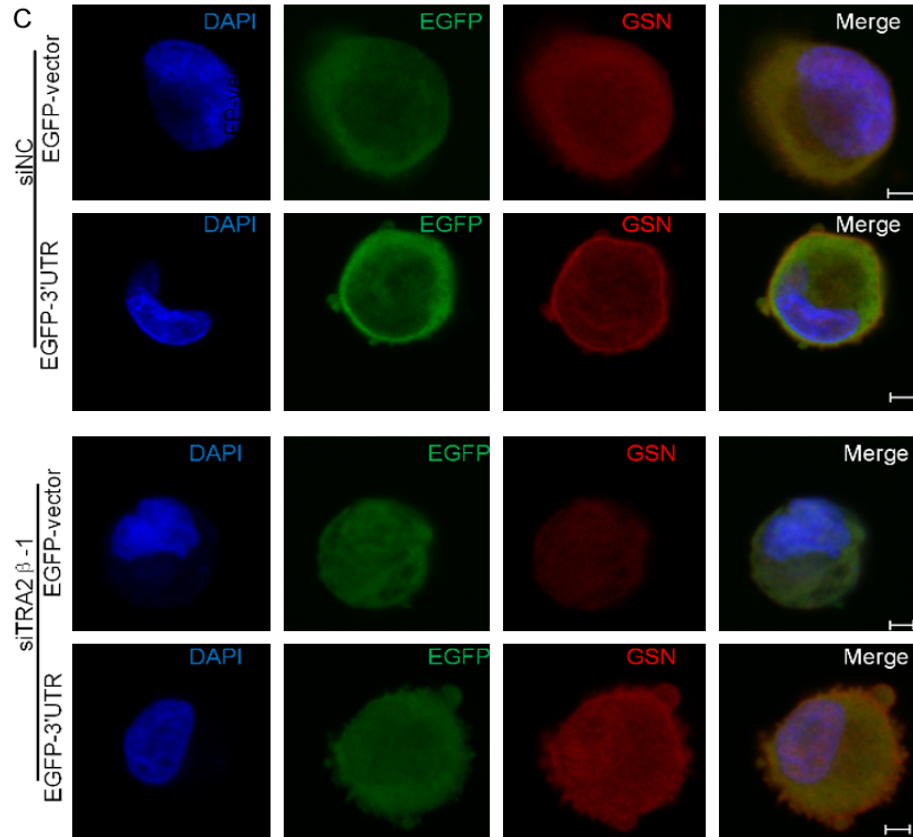

D

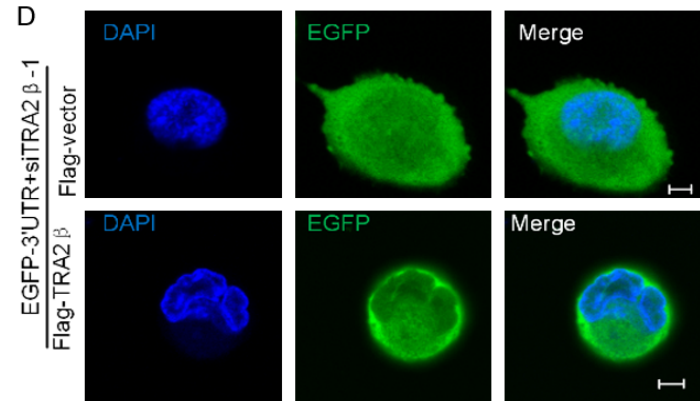

## The anti-tumor functions of GSN 3'UTR in NSCLC cells

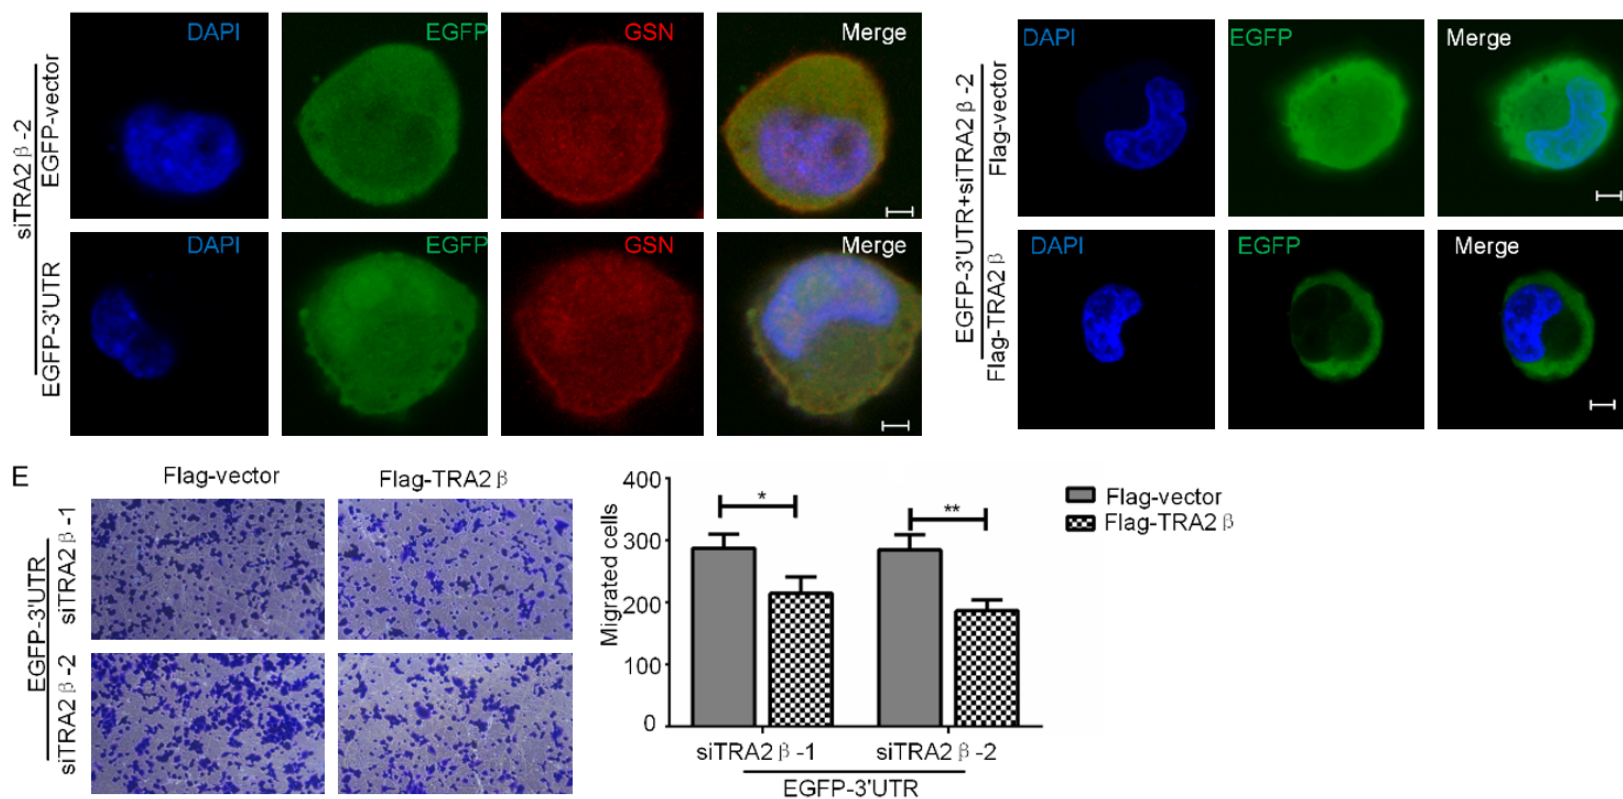

**Supplementary Figure 1.** (A) The Venn diagram showing the overlap between the proteins bound to *Flag*-GSN transcript and those to *Flag*-GSN-3'UTR transcript. (B) List of 3'UTR region-specific binding proteins. (C) H1299 cells were transfected with siNC or siTra2β-1 or siTra2β-2 for 24 h, and with EGFP-3'UTR or EGFP-vector for another 24 h, then subjected to immunofluorescence confocal microscopy for the subcellular localization of EGFP. (D, E) H1299 cells were co-transfected with EGFP-3'UTR and siTra2β-1 or siTra2β-2 for 24 h, and with Flag-tagged Tra2β or with empty vector for another 24 h, then subjected to IF assay (D) or transwell migration assay (E). Scale bars: 10 μm.
